# Supplementary material
Source: Springer Nature journal article supplement (https://www.springermedizin.de/resource/supplementary/12916_2011_441_MOESM1_ESM.pdf/9599966)
Supplement: MOESM1 [file 9599966]

**FIRST BREATH TRIAL**

**Baseline Data Collection**

**ENC Training**

**Post-ENC Baseline Data Collection**

**Randomization**

**Intervention Group**

**NRP Training**

**Control Group**

Screened (n = 1,916)  
Consented (n = 1,893)  
Births < 1500 grams or missing (n = 26)  
Eligible for primary outcome (n = 1,867)

Screened (n = 5,615)  
Consented (n = 5,612)  
Births < 1500 grams or missing (n = 84)  
Eligible for primary outcome (n = 5,528)

Screened (n = 2,930)  
Consented (n = 2,928)  
Births < 1500 grams or missing (n = 45)  
Eligible for primary outcome (n = 2,883)

Screened (n = 3,365)  
Consented (n = 3,365)  
Births < 1500 grams or missing (n = 48)  
Eligible for primary outcome (n = 3,317)
